# Supplementary material for: Characterization of key aroma compounds in Meilanchun sesame flavor style baijiu by application of aroma extract dilution analysis, quantitative measurements, aroma recombination, and omission/addition experiments
Source: Royal Society of Chemistry journal article supplement (doi:10.1039/c8ra02727g), 2018-01-01
Supplement: c8ra02727g1.pdf [file c8ra02727g1.pdf]

**Table. Schedule A. Quantitative parameters of 92 Compounds in Meilanchun Sesame Flavor Style Baijiu**

| count                   | compound                  | Quantified ion | IS <sup>a</sup> | n <sup>b</sup> | Standard Curve |           | R <sup>2c</sup> | Linear Range | Recovery (%) |
|-------------------------|---------------------------|----------------|-----------------|----------------|----------------|-----------|-----------------|--------------|--------------|
|                         |                           |                |                 |                | Slope          | Intercept |                 |              |              |
| <b>esters</b>           |                           |                |                 |                |                |           |                 |              |              |
| 1                       | ethyl acetate*            | 88             | IS3             | 6              | 0.04286        | 0.004634  | 0.9991          | 253.0-2024.0 | 91.6         |
| 2                       | ethyl 2-methylpropanoate* | 116            | IS4             | 6              | 0.2136         | -2.9323   | 0.9905          | 0.3960-19.80 | 95.8         |
| 3                       | ethyl butanoate*          | 88             | IS4             | 10             | 0.4433         | 0.5658    | 0.9982          | 0.2550-510.0 | 105.6        |
| 4                       | ethyl 2-methylbutanoate*  | 102            | IS4             | 9              | 0.8488         | 0.03224   | 0.999           | 0.2466-32.89 | 108.7        |
| 5                       | ethyl 3-methylbutanoate*  | 88             | IS4             | 9              | 0.5734         | 0.01608   | 0.9992          | 0.2600-34.67 | 106.4        |
| 6                       | ethyl pentanoate*         | 85             | IS4             | 8              | 0.5565         | 0.2597    | 0.9986          | 0.4300-86.00 | 105.9        |
| 7                       | ethyl hexanoate*          | 88             | IS3             | 6              | 0.6329         | -0.07126  | 0.9986          | 201.0-1612   | 112.0        |
| 8                       | ethyl lactate*            | 75             | IS3             | 6              | 0.09667        | 0.006092  | 0.9992          | 250.50-2004  | 104.1        |
| 9                       | diethyl butanedioate*     | 129            | IS5             | 6              | 2.3950         | 0.009055  | 0.9993          | 0.6897-34.48 | 106.5        |
| 10                      | ethyl propanoate          | 102            | IS5-2           | 6              | 0.00486        | 0.000693  | 0.9969          | 5.300-1060   | 94.7         |
| 11                      | ethyl 4-methylpentanoate  | 115            | IS5-2           | 5              | 0.01138        | 0.002001  | 0.9961          | 5.300-106.0  | 98.4         |
| <b>alcohols</b>         |                           |                |                 |                |                |           |                 |              |              |
| 1                       | 2-methyl-1-propanol*      | 74             | IS4             | 6              | 0.2860         | -0.0469   | 0.9932          | 5.400-216.0  | 92.9         |
| 2                       | 1-butanol*                | 56             | IS4             | 6              | 0.5037         | 0.5131    | 0.9902          | 2.500-200.0  | 98.6         |
| 3                       | 3-methyl-1-butanol*       | 55             | IS4             | 6              | 0.4596         | 0.8167    | 0.9984          | 5.400-216.0  | 106.3        |
| 4                       | 1-hexanol*                | 56             | IS4             | 6              | 4.2145         | 1.1466    | 0.9937          | 0.4200-84.00 | 102.5        |
| <b>carboxylic acids</b> |                           |                |                 |                |                |           |                 |              |              |
| 1                       | acetic acid*              | 60             | IS2             | 7              | 0.4980         | 0.05804   | 0.9953          | 151.5-1212   | 104.5        |
| 2                       | butyric acid*             | 60             | IS1             | 6              | 20.4174        | -23.7704  | 0.9987          | 15.15-242.4  | 94.5         |
| 3                       | 3-methylbutanoic acid*    | 60             | IS1             | 6              | 13.6220        | -0.6983   | 0.9958          | 0.9103-45.52 | 98.2         |
| 4                       | pentanoic acid*           | 60             | IS1             | 6              | 22.6466        | -8.2068   | 0.9974          | 2.612-104.5  | 93.1         |
| 5                       | hexanoic acid*            | 60             | IS1             | 8              | 18.3250        | -17.4996  | 0.9983          | 8.621-215.5  | 94.1         |
| 6                       | octanoic acid*            | 60             | IS1             | 5              | 8.3997         | -3.0989   | 0.9987          | 0.8828-22.07 | 106          |
| 7                       | decanoic acid             | 60             | IS5-2           | 5              | 0.1902         | -0.9641   | 0.9982          | 192.0-12200  | 115.2        |
| <b>aldehydes</b>        |                           |                |                 |                |                |           |                 |              |              |
| 1                       | 3-methylbutanal*          | 58             | IS4             | 5              | 0.8719         | 0.0074    | 0.9957          | 0.7888-39.40 | 97.4         |

Table.continued

| count                     | compound                        | Quantified ion | IS <sup>a</sup> | n <sup>b</sup> | Standard Curve |           | R <sup>2c</sup> | Linear Range  | Recovery (%) |
|---------------------------|---------------------------------|----------------|-----------------|----------------|----------------|-----------|-----------------|---------------|--------------|
|                           |                                 |                |                 |                | Slope          | Intercept |                 |               |              |
| <b>aromatic compounds</b> |                                 |                |                 |                |                |           |                 |               |              |
| 1                         | phenethyl alcohol*              | 91             | IS5             | 5              | 3.3110         | -0.05813  | 0.9979          | 1.690-33.79   | 102.5        |
| 2                         | phenyl acetaldehyde             | 91             | IS5             | 8              | 3.2001         | 0.05065   | 0.9978          | 37.90-1897    | 96.2         |
| 3                         | ethyl phenylacetate             | 91             | IS5             | 5              | 6.2687         | -0.08484  | 0.9985          | 16.67-1655    | 92.2         |
| 4                         | ethyl 3-phenylpropanoate        | 104            | IS5             | 5              | 2.5192         | 0.06822   | 0.9987          | 57.20-2862    | 93           |
| 5                         | vanillin                        | 151            | IS5-2           | 6              | 0.0251         | -0.0890   | 0.9986          | 24.00-960.0   | 100.2        |
| <b>pyrazines</b>          |                                 |                |                 |                |                |           |                 |               |              |
| 1                         | 2,6-dimethyl pyrazine           | 108            | IS5-2           | 6              | 0.4198         | -0.04714  | 0.9963          | 5.100-255.0   | 95.3         |
| 2                         | 2,3,5-trimethyl pyrazine        | 122            | IS5-2           | 7              | 0.4162         | -0.1054   | 0.9968          | 25.25-1010    | 93.2         |
| 3                         | 2,3-diethyl-5-methyl pyrazine   | -              | -               | -              | -              | -         | -               | -             | -            |
| <b>phenols</b>            |                                 |                |                 |                |                |           |                 |               |              |
| 1                         | guaiacol                        | 109            | IS5-2           | 4              | 0.1625         | 0.001154  | 0.999           | 8.200-82.00   | 84.6         |
| 2                         | 4-methylphenol                  | 107            | IS5             | 7              | 3.0546         | -0.1018   | 0.9991          | 47.10-4710    | 97.8         |
| 3                         | 4-ethyl guaiacol                | 137            | IS5-2           | 7              | 3.3199         | -1.9108   | 0.9969          | 6.100-610.0   | 89.3         |
| <b>sulfides</b>           |                                 |                |                 |                |                |           |                 |               |              |
| 1                         | dimethyl trisulfide             | 126            | IS5             | 9              | 0.5026         | 0.001597  | 0.9989          | 7.060-2355.6  | 93.4         |
| 2                         | methional                       | 104            | ES <sup>b</sup> | 7              | 71.3171        | 785.6467  | 0.9991          | 8.1875-1637.5 | 96.9         |
| 3                         | 3-methylthiopropanol            | 106            | ES <sup>b</sup> | 7              | 202.8130       | 871.8886  | 0.9957          | 8.1875-1637.5 | 104.7        |
| <b>other odorants</b>     |                                 |                |                 |                |                |           |                 |               |              |
| 1                         | 1,1-diethoxyethane*             | 103            | IS4             | 6              | 0.0225         | -0.0086   | 0.9912          | 1.520-760.0   | 99.8         |
| 2                         | ethyl nicotinate                | 106            | IS5-2           | 4              | 0.04108        | -0.00991  | 0.9916          | 25.25-252.5   | 94.6         |
| 3                         | 3-phenylpyridine                | 155            | IS5-2           | 6              | 0.01724        | 0.03957   | 0.9984          | 42.50-850.0   | 104.1        |
| 4                         | isobutyraldehyde diethyl acetal | 103            | IS4             | 5              | 0.4650         | 0.0576    | 0.9945          | 1.670-100.0   | 98.6         |
| 5                         | 2,4,6-trimethyl-1,3-dioxane     | -              | -               | -              | -              | -         | -               | -             | -            |
| 6                         | 2-methoxy-1,3-dioxolane         | 73             | IS3             | 5              | 0.7851         | 1.6305    | 0.9956          | 1.530-112.0   | 99.2         |
| 7                         | ethyl acrylate                  | 55             | IS4             | 5              | 0.6834         | 0.8765    | 0.9978          | 2.650-109.0   | 99.4         |

**Table.continued**

| count                                    | compound                          | Quantified ion | IS <sup>a</sup> | n <sup>b</sup> | Standard Curve |           | R <sup>2c</sup> | Linear Range | Recovery (%) |
|------------------------------------------|-----------------------------------|----------------|-----------------|----------------|----------------|-----------|-----------------|--------------|--------------|
|                                          |                                   |                |                 |                | Slope          | Intercept |                 |              |              |
| 8                                        | 2,3-butanedione                   | 43             | IS4             | 5              | 0.7145         | 0.3648    | 0.9967          | 1.000-80.00  | 98.6         |
| 9                                        | uk1-M                             | -              | -               | -              | -              | -         | -               | -            | -            |
| 10                                       | uk2-M                             | -              | -               | -              | -              | -         | -               | -            | -            |
| <b>Odourless compounds in Meilanchun</b> |                                   |                |                 |                |                |           |                 |              |              |
| 1                                        | ethyl octanoate*                  | 88             | IS5             | 7              | 2.1350         | 0.01491   | 0.999           | 0.1780-17.80 | 94.7         |
| 2                                        | hexyl acetate                     | 84             | IS4             | 8              | 0.2643         | -0.00412  | 0.9984          | 60.00-10000  | 95.3         |
| 3                                        | propyl hexanoate                  | 99             | IS5-2           | 6              | 0.1983         | -0.03213  | 0.9951          | 28.25-1130   | 96.3         |
| 4                                        | butyl hexanoate                   | 99             | IS5-2           | 7              | 0.08215        | -0.08905  | 0.9965          | 119.0-5950   | 94.8         |
| 5                                        | hexyl hexanoate                   | 117            | IS5-2           | 5              | 0.1738         | -0.06129  | 0.9993          | 300.0-3000   | 102.2        |
| 6                                        | ethyl nonanoate                   | 88             | IS5             | 8              | 1.3991         | 0.007299  | 0.9991          | 11.33-1889   | 94           |
| 7                                        | ethyl decanoate                   | 88             | IS5-2           | 5              | 0.1857         | -0.1652   | 0.9966          | 80.00-2000   | 103.9        |
| 8                                        | pentylhexanoate                   | 117            | IS5-2           | 5              | 0.0790         | -0.01912  | 0.9957          | 27.75-555.0  | 95.9         |
| 9                                        | ethyl 2-hydroxy-4-methylvalerate* | 69             | IS5             | 6              | 2.0564         | -6.5044   | 0.9968          | 2.182-85.50  | 99.4         |
| 10                                       | ethyl heptanoate*                 | 88             | IS4             | 10             | 1.0638         | -0.04603  | 0.9996          | 0.0525-52.50 | 99.5         |
| 11                                       | isobutyl hexanoate                | 99             | IS4             | 6              | 1.2132         | -0.03109  | 0.9981          | 105.0-5250   | 97.9         |
| 12                                       | isopentylhexanoate                | 70             | IS5             | 7              | 1.7385         | 0.01753   | 0.9984          | 51.50-5150   | 94.3         |
| 13                                       | ethyl dodecanoate                 | 88             | IS5-2           | 5              | 0.1330         | 0.06638   | 0.9978          | 51.50-1030   | 95           |
| 14                                       | ethyl myristate                   | 157            | IS5             | 5              | 0.1394         | -0.00356  | 0.9978          | 35.70-1427.6 | 97.7         |
| 15                                       | butyl butyrate                    | 71             | IS4-2           | 5              | 9.5710         | -24.8454  | 0.9815          | 49.00-1960   | 101.3        |
| 16                                       | hexyl butyrate                    | 71             | IS5-2           | 5              | 6.0533         | -3.9544   | 0.9957          | 17.70-422.5  | 113.9        |
| 17                                       | diethyl octanedioate              | 143            | IS5-2           | 5              | 2.2679         | -0.0986   | 0.9879          | 1.000-50.00  | 102          |
| 18                                       | ethyl hexadecanoate               | 88             | IS5-2           | 5              | 16.8518        | -3.4432   | 0.9926          | 10.00-200.0  | 90           |
| 19                                       | 1-propanol*                       | 60             | IS4             | 7              | 0.1313         | 1.9691    | 0.9967          | 4.310-431.0  | 102.5        |
| 20                                       | 1- heptanol                       | 70             | IS5-2           | 6              | 3.9459         | 1.0434    | 0.9972          | 1.940-194.0  | 105.3        |
| 21                                       | 1-octanol                         | 56             | IS5-2           | 5              | 9.1395         | -10.6868  | 0.9998          | 20.60-515.0  | 112.5        |
| 22                                       | propionic acid*                   | 60             | IS1             | 5              | 7.9079         | 0.9813    | 0.9992          | 9.386-82.40  | 99.4         |
| 23                                       | pentanoic acid*                   | 60             | IS1             | 5              | 6.3750         | 1.0321    | 0.9993          | 4.316-120.0  | 98.4         |

Table.continued

| count | compound                     | Quantified ion | IS <sup>a</sup> | n <sup>b</sup> | Standard Curve |           | R <sup>2c</sup> | Linear Range | Recovery (%) |
|-------|------------------------------|----------------|-----------------|----------------|----------------|-----------|-----------------|--------------|--------------|
|       |                              |                |                 |                | Slope          | Intercept |                 |              |              |
| 24    | heptanoic acid*              | 73             | IS1             | 5              | 7.6811         | -2.2568   | 0.9989          | 0.7172-17.93 | 91.3         |
| 25    | nonanoic acid                | 60             | IS5-2           | 5              | 1.3852         | -18.4863  | 0.9976          | 201.6-10080  | 98.8         |
| 26    | 4-methyl pentanoic acid*     | 57             | IS1             | 5              | 7.8408         | -2.4683   | 0.9985          | 0.7054-17.59 | 103.6        |
| 27    | acetoin*                     | 88             | IS4             | 6              | 0.1297         | -0.04051  | 0.9994          | 6.667-66.67  | 100.3        |
| 28    | ethyl benzoate               | 105            | IS5-2           | 5              | 1.3111         | 0.1215    | 0.9918          | 3.025-121.0  | 89.4         |
| 29    | benzyl alcohol               | 108            | IS5-2           | 5              | 0.03576        | 0.000345  | 0.999           | 3.850-192.5  | 99.3         |
| 30    | acetophenone                 | 95             | IS5-2           | 6              | 0.6204         | -0.01412  | 0.9987          | 4.700-235.0  | 99.6         |
| 31    | benzaldehyde*                | 106            | IS5             | 8              | 2.1952         | -0.01901  | 0.9988          | 0.3066-30.67 | 90.5         |
| 32    | 2-phenylethyl acetate        | 104            | IS5             | 5              | 4.4663         | 0.03227   | 0.9989          | 19.30-386.2  | 105.2        |
| 33    | 2-furfural*                  | 96             | IS5             | 7              | 1.7522         | 1.6069    | 0.9989          | 4.310-434.5  | 97.3         |
| 34    | furfuryl alcohol             | 98             | IS5-2           | 5              | 0.00904        | -0.00375  | 0.991           | 11.20-280.0  | 90.3         |
| 35    | 2-acetylfuran                | 95             | IS5-2           | 6              | 0.6204         | -0.01412  | 0.9987          | 4.700-235.0  | 99.6         |
| 36    | 5-methylfurfural             | 110            | IS5-2           | 6              | 0.3358         | -0.05285  | 0.9938          | 5.200-520.0  | 93.5         |
| 37    | 2-acetyl-5-methylfuran       | 109            | IS5-2           | 5              | 0.2658         | 0.002283  | 0.9971          | 2.652-105.0  | 97.9         |
| 38    | tetramethylpyrazine          | 136            | IS5-2           | 4              | 0.2479         | -0.06537  | 0.9972          | 24.75-247.5  | 101.7        |
| 39    | phenol                       | 94             | IS5-2           | 7              | 2.5804         | -2.7461   | 0.9987          | 9.500-475.0  | 110.2        |
| 40    | 4-ethylphenol                | 107            | IS5             | 5              | 4.8707         | -0.1337   | 0.9991          | 26.20-1310   | 99.4         |
| 41    | 2,4-di-tert-butylphenol      | 191            | IS5-2           | 5              | 2.5595         | -0.3855   | 0.9998          | 15.75-630.0  | 100.6        |
| 42    | ethyl 3-methylthiopropionate | 148            | IS5-2           | 4              | 0.5326         | -0.1275   | 0.9950          | 9.700-97.00  | 97.5         |
| 43    | 1,1,3-triethoxypropane       | 103            | IS4             | 8              | 0.5660         | -0.01308  | 0.9987          | 45.30-7555   | 96.8         |
| 44    | $\gamma$ -valerolactone      | 85             | IS5             | 8              | 0.7155         | -0.00257  | 0.9983          | 58.00-9667   | 97.2         |
| 45    | 3-(2-furyl)-2-propenal       | 122            | IS5             | 5              | 0.7628         | -0.00937  | 0.9978          | 28.25-1130   | 92.8         |
| 46    | $\alpha$ -terpenol           | 121            | IS5-2           | 6              | 0.3788         | -0.0068   | 0.9977          | 2.925-117.0  | 94.7         |
| 47    | nonanal                      | 57             | IS5-2           | 5              | 4.4211         | -1.7001   | 0.9939          | 8.190-163.8  | 108.7        |
| 48    | ethyl 2-furoate              | 95             | IS5-2           | 6              | 19.2009        | -33.684   | 0.9999          | 2.594-648.5  | 102.5        |
| 49    | lactic acid*                 | -              | ES <sup>d</sup> | 5              | 0.06000        | 1.1196    | 0.9992          | 219.7-4394   | 102.01       |

<sup>a</sup> The method of quantitation for the compound was internal standard except special label. IS1(pivalic acid), IS2(2- ethyl butyric acid), IS3(methyl octanoate), IS4(methyl hexanoate), IS5(octyl propionate) as internal standard substance. IS5-2 and IS4-2 mean different concentration from IS5 and IS4, respectively. <sup>b</sup>The number of point to be establish the standard curve. <sup>c</sup> Coefficient of determination. <sup>d</sup> The method of quantitation for the compound was external standard. \*The unit of concentration was mg/L, the unit of other compounds was µg/L.

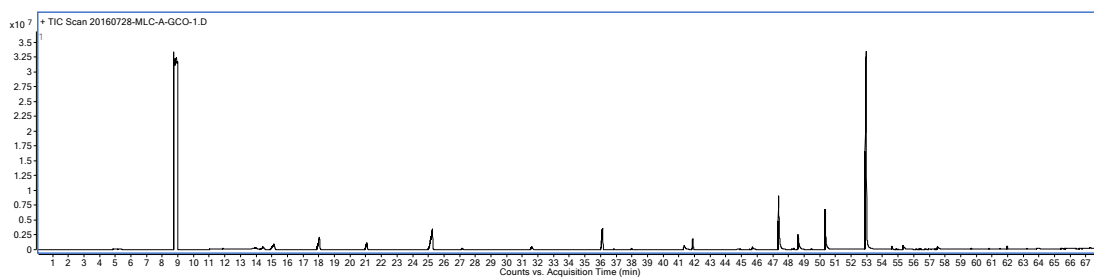

a

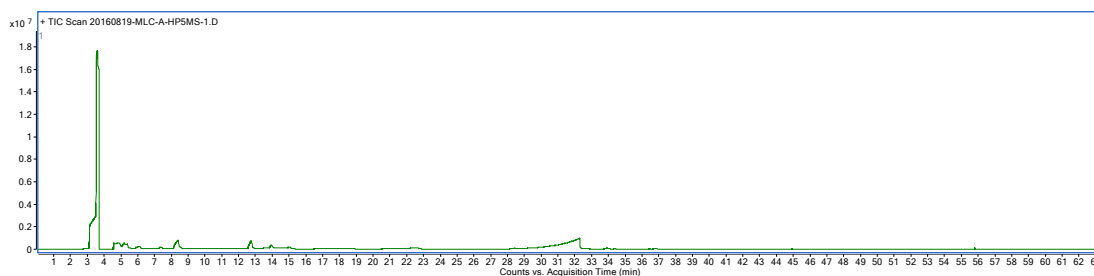

b

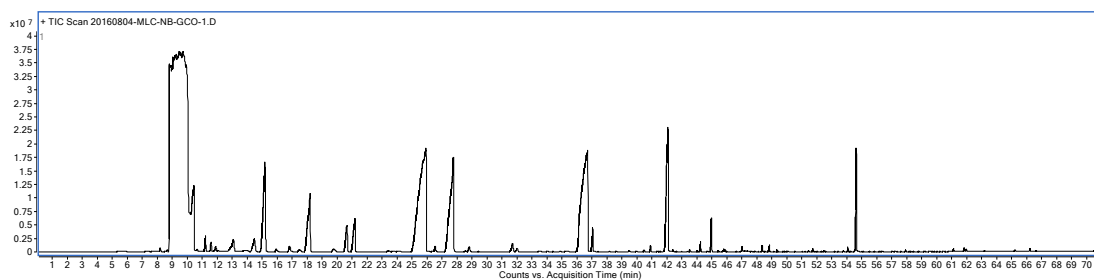

c

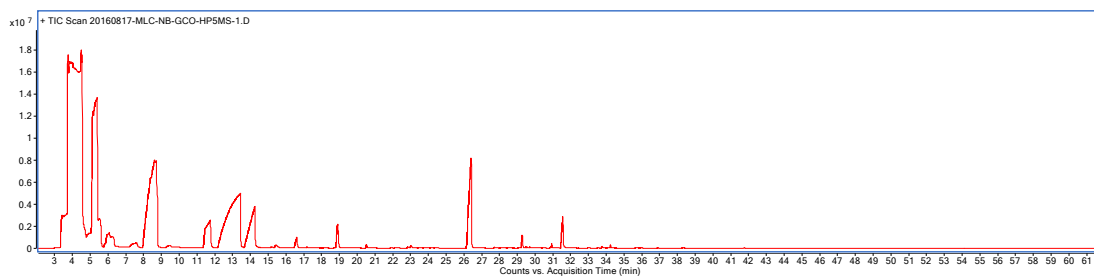

d

Fig Total ion current chromatogram of meilanchun (a. acidic fraction in DB-WAX fused silica capillary; b. acidic fraction in HP-5MS fused silica capillary; c. neutral/basic fraction in DB-WAX fused silica capillary; d. neutral/basic fraction in HP-5MS fused silica capillary.)
